# Supplementary material for: The M6A methyltransferase METTL3 promotes the development and progression of prostate carcinoma via mediating MYC methylation
Source: PubMed Central journal article supplement (PMC7150444; doi:10.7150/jca.42338), 2020-03-25
Supplement: jcav11p3588s1.pdf [file jcav11p3588s1.pdf]

**Supplementary Table S1.** The ONCOMINE database was used to analyze the mRNA levels of the four major m<sup>6</sup>A modification genes in PCa tissues and normal prostate tissues.

| Gene    | Dataset                      | Fold change  | P-value         |
|---------|------------------------------|--------------|-----------------|
| METTL3  | Arredouani Prostate          | 1.308        | 1.01E-04        |
|         | Luo Prostate 2               | 1.49         | 9.00E-03        |
|         | Wallace Prostate             | 1.677        | 5.79E-04        |
|         | Grasso Prostate              | 1.343        | 1.66E-06        |
|         | <b><i>Singh Prostate</i></b> | <b>2.153</b> | <b>3.69E-04</b> |
|         | Welsh Prostae                | 5.89         | 1.10E-02        |
|         | Yu Prostate                  | 1.1          | 1.90E-02        |
|         | LaTulippe Prosate            | 1.097        | 1.53E-01        |
|         | Vanaja Prostate              | 1.509        | 5.00E-03        |
|         | Liu Prostate                 | 1.091        | 1.73E-01        |
|         | Varambally Prostate          | 1.248        | 1.24E-01        |
|         | Taylor Prostate 3            | 1.089        | 4.00E-02        |
| METTL14 | Vanaja Prostate              | 1.336        | 4.00E-03        |
|         | Varambally Prostate          | 1.053        | 3.29E-01        |
|         | Taylor Prostate 3            | -1.049       | 7.91E-01        |
|         | Grasso Prostate              | -1.124       | 9.98E-01        |
|         | Arredouani Prostate          | -1.415       | 9.89E-01        |
| ALKBH5  | Varambally Prostate          | -1.456       | 5.00E-04        |
|         | Tomlins Prostate             | -1.275       | 8.90E-02        |
|         | Lapointe Prostate            | -1.067       | 8.49E-01        |
|         | Vanaja Prostate              | 1.706        | 2.23E-01        |
|         | Arredouani Prostate          | -1.396       | 4.70E-04        |
|         | Luo Prostate 2               | -1.148       | 9.20E-02        |
|         | Grasso Prostate              | -1.357       | 4.60E-04        |
|         | Taylor Prostate 3            | -1.137       | 1.06E-04        |
| FTO     | Holzbeierlein Prostate       | -1.415       | 9.50E-02        |
|         | Magee Prostate               | -1.182       | 3.00E-02        |
|         | Wallace Prostate             | -1.031       | 3.99E-01        |
|         | Singh Prostate               | -1.578       | 5.20E-02        |

|                     |         |          |
|---------------------|---------|----------|
| Tomlins Prostate    | -47.591 | 2.63E-01 |
| LaTulippe Prostate  | -1.58   | 3.60E-02 |
| Yu Prostate         | -1.195  | 5.00E-03 |
| Welsh Prostate      | -1.659  | 1.13E-04 |
| Liu Prostate        | -1.077  | 1.80E-02 |
| Luo Prostate 2      | -2      | 1.57E-01 |
| Taylor Prostate 3   | 1.004   | 5.82E-01 |
| Vanaja Prostate     | -1.099  | 8.40E-02 |
| Arredouani Prostate | -1.161  | 3.50E-02 |
| Grasso Prostate     | -1.476  | 1.73E-10 |
| Varambally Prostate | -1.267  | 2.00E-03 |

---
